# Supplementary material
Source: PubMed Central journal article supplement (PMC9636848)
Supplement: mmc1.pdf [file mmc1.pdf]

# THE LANCET

## Microbe

### Supplementary appendix 1

This translation in Swahili was submitted by the authors and we reproduce it as supplied. It has not been peer reviewed. *The Lancet's* editorial processes have only been applied to the original in English, which should serve as reference for this manuscript.

Tafsiri hii katika Swahili iliwasilishwa na waandishi na tunatengeneza tena kama hutolewa. Haijapitiwa. Mchakato wa hariri wa Lancet Global Health umetumika tu kwa asili kwa Kiingereza, ambayo inapaswa kutumika kama kumbukumbu kwa muswada hii.

Supplement to: Cordery R, Purba AK, Begum L, et al. Frequency of transmission, asymptomatic shedding, and airborne spread of *Streptococcus pyogenes* in schoolchildren exposed to scarlet fever: a prospective, longitudinal, multicohort, molecular epidemiological, contact-tracing study in England, UK. *Lancet Microbe* 2022; published online March 10. [https://doi.org/10.1016/S2666-5247\(21\)00332-3](https://doi.org/10.1016/S2666-5247(21)00332-3).

**Wigo wa vimelea vya maradhi-tumbo na athari zake katika kiasi cha dawa za kifua kikuu katika damu mwilini kwa watoto, katika kijiji nchini Tanzania. Utafiti kwa muundo wa kufuatilia kundi kwa mtazamo-mbele**

**Utangulizi:** Vimelea vya maradhi-tumbo vimeenea katika mazingira yenye ugonjwa wa kifua kikuu (KK) na vimeonekana kudhoofisha kazi ya ufyonzaji katika utumbo; kwahiyo uwepo wa vimelea vya maradhi- tumbo vinaweza kuwa na athari hasi katika mchakato wa dawa za KK mwilini, hususani kwa watoto wenye utapiamlo. Tulitafuta kupima wingi wa vimelea vya maradhi-tumbo miongoni mwa watoto walioanzishiwa tiba ya KK eneo la kijijini nchini Tanzania na kukadiria athari katika kiasi cha dawa za KK kilichopo kwenye damu.

**Njia:** Tulifanya utafiti kwa muundo wa kufuatilia kundi kwa mtazamo mbele katika kituo kimojawapo kilichopo kijijini Tanzania kama uchunguzi wa ziada katika utafiti mkubwa wa nchi kadhaa. Utafiti ulichukua watoto chini ya umri wa miaka 15 waliothibitishwa au kuhisiwa kuwa na KK sanjari na kuanzishiwa tiba kwa dawa za mstari wa kwanza, na tuliwaacha wale walioshindwa kutoa sampuli. Washiriki waliingia kwa mfululizo kutoka wadi ya watoto au kliniki ya nje ya KK katika Hospitali ya Kilutheri ya Haydom Tanzania. Matokeo makuu ilikuwa ni kupima dalili za magonjwa yaletwayo na vimelea vya maradhi-tumbo na athari zake katika mchakato wa dawa za KK kwenye damu. Tulipima uwingi wa vimelea vya maradhi tumbo (ikifafanuliwa kama jumla ya vimelea tofauti vya maradhi-tumbo vilivyogunduliwa kwenye kinyesi) kwa kutumia teknolojia ya vinasaba ya kugundua vimelea vingi ambapo kwa mara moja iligundua vimelea 37 vikiwemo bakteria, virusi na vidudu aina au makundi aina kutoka kwenye kinyesi kilichokusanywa ndani ya masaa 72 ya uanzishwaji wa tiba. Tathmini pana ya kiafya ilifanyika awali ikijumuisha uwepo wa dalili za magonjwa ya tumbo na tulikusanya damu baada ya takribani wiki mbili za hali thabiti za kutumia dawa kipindi chote na kupata kipimo na mkusanyiko wa isoniazid, rifampicin, pyrazinamide na ethambutol kwa kutumia mtambo maalumu. Tulipima kiasi kikubwa kilichofikiwa cha dawa kwenye damu na kwa kutumia uchambuzi wa vyumba tulitambua kiasi chote cha dawa kilichokuwepo kwenye damu kwa masaa 24. Tulilinganisha uwingi wa vimelea-tumbo na uchakatwaji wa vipimo vya dawa kwenye damu kwa kutofautisha kwa makundi mawili na mengi kwa kutumia mahesabu uchambuzi ya kurudi nyuma.

**Matokeo:** Kati ya mwezi Juni 2016 mpaka Februari 2018, watoto 58 walitathminiwa na 44 walikuwa na vipimo kamili vya kinyesi na kiasi cha dawa kwenye seramu na walifanyiwa uchambuzi. Watoto 20 (45%) walikuwa wa kike na 24 (55%) wa kiume. Watoto 37 (84%) walikuwa na utapiamlo wa hali ya wastani na mkali. Wastani wa jumla ya vimelea vya magonjwa-tumbo kwa kila mtoto ni 2.1 (1.3 kupotoka kawaida). Lengo la kiasi kwenye damu (seramu) kilichotegemewa kilifikwa kwa watoto, rifampicin 8 (18%) kati ya 44, isoniazid 24 (54%) kati ya 44, pyrazinamide 28 (74%) kati ya 38, na ethambutol 6 (15%) kati ya 39. Ukilinganisha kwa kudhibiti ulinganifu, kila ongezeko la jumla la bakteria wa magonjwa tumbo aliegundulika alihusika, rifampicin kupunguza kiasi cha juu kwa 40% (95%Kiasi kuamini:-62 mpaka -5) na ethambutol kupunguza kiasi cha juu 36% (95%Kiasi kuamini:-52 mpaka -14) wakati virusi vya magonjwa tumbo vilihusika kwa isoniazid kupungua 51% (95%Kiasi kuamini:-75 mpaka -7). Ukichanganya dalili za magonjwa ya tumbo na kugundulika kwa kimelea cha ziada vilihusika katika kupunguza 27% ya rifampicin katika seramu kwa masaa 24(95%Kiasi kuamini: -47 mpaka -1).

**Tafsiri:** Imekuwa nadra kwa watoto wa Tanzania waliopatiwa tiba ya ugonjwa wa KK kufikia kiasi cha dawa mwilini kilicholengwa. Uwepo wa vimelea vya maradhi-tumbo katika miili yao imekuwa ni kawaida na imehusishwa kwa umuhimu mkubwa katika kupunguza mkusanyiko wa dawa kadhaa za ugonjwa wa KK. Utafiti zaidi unahitajika katika makundi makubwa ya wagonjwa kuchunguza kiufundi zaidi mahusiano ya vimelea vya magonjwa na mchakato wa dawa mwilini au kuamua endapo kuchunguza na kutoa tiba ya vimelea vya maradhi-tumbo wakati wa kuanza tiba ya ugonjwa wa KK kutaboresha mchakato dawa unaotegemewa

**Ufadhili:** Taasisi ya Taifa ya magonjwa ya mzio na ambukizi, Taasisi za Afya za Taifa
