# Supplementary material
Source: PubMed Central journal article supplement (PMC9636848)
Supplement: mmc2.pdf [file mmc2.pdf]

# THE LANCET Microbe

## Supplementary appendix 2

This appendix formed part of the original submission and has been peer reviewed. We post it as supplied by the authors.

Supplement to: Cordery R, Purba AK, Begum L, et al. Frequency of transmission, asymptomatic shedding, and airborne spread of *Streptococcus pyogenes* in schoolchildren exposed to scarlet fever: a prospective, longitudinal, multicohort, molecular epidemiological, contact-tracing study in England, UK. *Lancet Microbe* 2022; published online March 10. [https://doi.org/10.1016/S2666-5247\(21\)00332-3](https://doi.org/10.1016/S2666-5247(21)00332-3).

## Supplementary Appendix for Cordery et al

### Contents

|                          |                                                                    | Page  |
|--------------------------|--------------------------------------------------------------------|-------|
| Supplementary Table 1.   | Case Definitions                                                   | 2     |
| Supplementary Table 2.   | Study Site Recruitment                                             | 3     |
| Supplementary Table 3.   | Cases in each setting- detailed results                            | 4     |
| Supplementary Table 4.   | Household contacts in each setting- detailed results               | 5     |
| Supplementary Table 5.   | School contacts in each setting- detailed results                  | 6     |
| Supplementary Table 6.   | Surface swab results (settings 1-3, 2018)                          | 7     |
| Supplementary Table 7.   | SNPs between isolates within each cluster                          | 8     |
| Supplementary Table 8.   | Accession numbers of genomes from each setting                     | 9-13  |
| Supplementary Table 9.   | Genomes from Chalker et al (ref.12) used for analysis              | 14    |
| Supplementary Figure S1. | Phylogenetic relationship of <i>emm6</i> strains (setting 1).      | 15    |
| Supplementary Figure S2. | Phylogenetic relationship of <i>emm1</i> strains (settings 2 & 3). | 16    |
| Supplementary Figure S3. | Phylogenetic relationship of <i>emm4</i> strains (settings 4 & 5). | 17    |
| Supplementary Figure S4. | Phylogenetic relationship of <i>emm3</i> strains (setting 6).      | 18    |
| Supplementary Methods    |                                                                    | 19-21 |
| Suppl. References        |                                                                    | 21    |

**Supplementary Table 1. Scarlet Fever Case Definitions**

| <b>Definitions</b> |                                                                                                                                                                                                                                                                                                                                                                                                                                                  |
|--------------------|--------------------------------------------------------------------------------------------------------------------------------------------------------------------------------------------------------------------------------------------------------------------------------------------------------------------------------------------------------------------------------------------------------------------------------------------------|
| Confirmed          | Clinical diagnosis of Scarlet Fever by a health professional and <i>S. pyogenes</i> detected on a throat swab                                                                                                                                                                                                                                                                                                                                    |
| Probable           | Clinical diagnosis of Scarlet Fever by a health professional                                                                                                                                                                                                                                                                                                                                                                                     |
| Possible           | Case reported by a reliable source (e.g. nursery manager, school secretary), presenting with signs and symptoms consistent with scarlet fever, and a close epidemiological link e.g. household contact of a confirmed case; or attending school where there is a confirmed scarlet fever outbreak<br>Cases reported by a health professional where scarlet fever is part of a differential diagnosis and other infections may be just as likely. |
| Carriage           | Throat swab positive for <i>S. pyogenes</i> in asymptomatic individual                                                                                                                                                                                                                                                                                                                                                                           |
| Outbreak           | 2 or more probable or confirmed cases of scarlet fever with epidemiological link in time, place and person i.e. in children or staff member, within 10 days of each other in the same school or nursery class.                                                                                                                                                                                                                                   |

Inclusion criteria for participating schools were two confirmed or probable scarlet fever cases aged 2-8 years from the same class within ten days of each other, with the most recent case arising in the preceding 48h. Cases were prospectively swabbed if they were confirmed or probable.

**Supplementary Table 2. Study Site case and household recruitment by setting**

|   | <b>Age group (years)</b> | <b>Inferred outbreak emm type</b> | <b>Final scarlet fever outbreak size</b> | <b>Cases recruited</b> | <b>Whole class size</b> | <b>Attack rate in setting*</b> | <b>Household contacts recruited</b> |
|---|--------------------------|-----------------------------------|------------------------------------------|------------------------|-------------------------|--------------------------------|-------------------------------------|
| 1 | 3-4                      | Emm6                              | 2 confirmed                              | 2                      | 38                      | 5.2%                           | 4                                   |
| 2 | 5-6                      | Emm1 (M1 <sub>UK</sub> )          | 4 probable<br>9 possible                 | 2                      | 29                      | 4.5-14.8%                      | 3                                   |
| 3 | 4-5                      | Emm1 (M1 <sub>UK</sub> )          |                                          | 2                      | 59                      |                                | 0                                   |
| 4 | 3-4                      | Emm4                              | 4 confirmed<br>4 probable<br>6 possible  | 3                      | 40                      | 20-35%                         | 7                                   |
| 5 | 4-5                      | Emm4                              | 1 confirmed<br>1 probable<br>3 possible  | 0                      | 53                      | 3.8-9.4%                       | 0                                   |
| 6 | 4-5                      | Emm3.93                           | 3 probable<br>3 possible                 | 3                      | 59                      | 5.0-10.1%                      | 3                                   |

\*Attack rate range derived from (confirmed + probable) and (confirmed + probable +possible) cases.

**Supplementary Table 3. Cases in each setting- detailed results**

|                  |                         | <i>S. pyogenes</i> swab results, no. of children (outbreak strain confirmed by WGS) |       |       |       |        |        |        |          |         |  |
|------------------|-------------------------|-------------------------------------------------------------------------------------|-------|-------|-------|--------|--------|--------|----------|---------|--|
|                  | GP swab<br>Y/N (result) | Week 1                                                                              |       |       |       | Week 2 | Week 3 | Week 4 | Week 7/8 | Week 16 |  |
|                  |                         | Day 1                                                                               | Day 2 | Day 3 | Day 4 |        |        |        |          |         |  |
| <b>Setting 1</b> |                         |                                                                                     |       |       |       |        |        |        |          |         |  |
| <b>Case 1</b>    | Y (+)                   |                                                                                     |       |       |       |        |        |        |          |         |  |
| Throat           |                         | NEG                                                                                 | NEG   | NEG   | NEG   | NEG    | NEG    | NEG    |          |         |  |
| Cough            |                         | NEG                                                                                 | NEG   | NEG   | NEG   | NEG    | NEG    | NEG    |          |         |  |
| Hand             |                         | NEG                                                                                 | NEG   | NEG   | NEG   | NEG    | NEG    | NEG    |          |         |  |
| <b>Case 2</b>    | Y (+)                   |                                                                                     |       |       |       |        |        |        |          |         |  |
| Throat           |                         | NEG                                                                                 | NEG   | NEG   | NEG   | NEG    | NEG    | NEG    |          |         |  |
| Cough            |                         | NEG                                                                                 | NEG   | NEG   | NEG   | NEG    | NEG    | NEG    |          |         |  |
| Hand             |                         | NEG                                                                                 | NEG   | NEG   | NEG   | NEG    | NEG    | NEG    |          |         |  |
| <b>Setting 2</b> |                         |                                                                                     |       |       |       |        |        |        |          |         |  |
| <b>Case 1</b>    | N                       |                                                                                     |       |       |       |        |        |        |          |         |  |
| Throat           |                         | NEG                                                                                 | NEG   | ND    | ND    | NEG    | +      | ND     |          |         |  |
| Cough            |                         | NEG                                                                                 | NEG   | ND    | ND    | NEG    | +      | ND     |          |         |  |
| Hand             |                         | NEG                                                                                 | NEG   | ND    | ND    | NEG    | +      | ND     |          |         |  |
| <b>Case 2</b>    | N                       |                                                                                     |       |       |       |        |        |        |          |         |  |
| Throat           |                         | NEG                                                                                 | NEG   | NEG   | ND    | NEG    | +      | ND     |          |         |  |
| Cough            |                         | NEG                                                                                 | NEG   | NEG   | ND    | NEG    | NEG    | ND     |          |         |  |
| Hand             |                         | NEG                                                                                 | NEG   | NEG   | ND    | NEG    | NEG    | ND     |          |         |  |
| <b>Setting 3</b> |                         |                                                                                     |       |       |       |        |        |        |          |         |  |
| <b>Case 1</b>    | N                       |                                                                                     |       |       |       |        |        |        |          |         |  |
| Throat           |                         | NEG                                                                                 | ND    | ND    | ND    | NEG    | ND     | NEG    |          |         |  |
| Cough            |                         | NEG                                                                                 | ND    | ND    | ND    | NEG    | ND     | NEG    |          |         |  |
| Hand             |                         | NEG                                                                                 | ND    | ND    | ND    | NEG    | ND     | NEG    |          |         |  |
| <b>Case 2</b>    | N                       |                                                                                     |       |       |       |        |        |        |          |         |  |
| Throat           |                         | NEG                                                                                 | ND    | ND    | ND    | ND     | ND     | NEG    |          |         |  |
| Cough            |                         | NEG                                                                                 | ND    | ND    | ND    | ND     | ND     | NEG    |          |         |  |
| Hand             |                         | NEG                                                                                 | ND    | ND    | ND    | ND     | ND     | ND     |          |         |  |
| <b>Setting 4</b> |                         |                                                                                     |       |       |       |        |        |        |          |         |  |
| <b>Case 1</b>    | Y (-)                   |                                                                                     |       |       |       |        |        |        |          |         |  |
| Throat           |                         | +                                                                                   | +     | +     | ND    | +      | NEG    |        |          | +       |  |
| Cough            |                         | NEG                                                                                 | NEG   | NEG   | ND    | NEG    | NEG    |        |          | ND      |  |
| Hand             |                         | NEG                                                                                 | NEG   | NEG   | ND    | NEG    | NEG    |        |          | ND      |  |
| <b>Case 2</b>    | Y (+)                   |                                                                                     |       |       |       |        |        |        |          |         |  |
| Throat           |                         | NEG                                                                                 | NEG   | NEG   | ND    | NEG    | NEG    |        |          | NEG     |  |
| Cough            |                         | NEG                                                                                 | NEG   | NEG   | ND    | NEG    | NEG    |        |          | ND      |  |
| Hand             |                         | NEG                                                                                 | NEG   | NEG   | ND    | NEG    | NEG    |        |          | ND      |  |
| <b>Case 3*</b>   | Y (+)                   |                                                                                     |       |       |       |        |        |        |          |         |  |
| Throat           |                         | ND                                                                                  | ND    | ND    | ND    | NEG    | NEG    | NEG    |          | NEG     |  |
| Cough            |                         | ND                                                                                  | ND    | ND    | ND    | NEG    | NEG    | NEG    |          | ND      |  |
| Hand             |                         | ND                                                                                  | ND    | ND    | ND    | NEG    | NEG    | NEG    |          | ND      |  |
| <b>Setting 6</b> |                         |                                                                                     |       |       |       |        |        |        |          |         |  |
| <b>Case 1</b>    | N                       |                                                                                     |       |       |       |        |        |        |          |         |  |
| Throat           |                         | NEG                                                                                 | ND    | ND    | ND    | +      | +      |        | +        |         |  |
| Cough            |                         | NEG                                                                                 | ND    | ND    | ND    | NEG    | NEG    |        | ND       |         |  |
| Hand             |                         | NEG                                                                                 | ND    | ND    | ND    | NEG    | NEG    |        | ND       |         |  |
| <b>Case 2</b>    | Y (+)                   |                                                                                     |       |       |       |        |        |        |          |         |  |
| Throat           |                         | NEG                                                                                 | ND    | ND    | ND    | NEG    | +      |        | NEG      |         |  |
| Cough            |                         | NEG                                                                                 | ND    | ND    | ND    | NEG    | NEG    |        | ND       |         |  |
| Hand             |                         | NEG                                                                                 | ND    | ND    | ND    | NEG    | NEG    |        | ND       |         |  |
| <b>Case 3**</b>  | N                       |                                                                                     |       |       |       |        |        |        |          |         |  |
| Throat           |                         | +                                                                                   | ND    | ND    | ND    | NEG    | NEG    |        | NEG      |         |  |
| Cough            |                         | +                                                                                   | ND    | ND    | ND    | NEG    | NEG    |        | ND       |         |  |
| Hand             |                         | NEG                                                                                 | ND    | ND    | ND    | NEG    | NEG    |        | ND       |         |  |

Positive *S. pyogenes* result indicated by '+'; negative by 'NEG'. Hatched cells indicate intentional pause in study  
 \*Case 3 in setting 4 was studied weekly; \*\*Case 3 in setting 6 was identified on day 1 of the study (initially recruited as a contact). Abbreviations: Hol, school holiday (unable to sample); WGS, whole genome sequencing; GP, General practitioner (primary care physician); Y, yes; N, no; ND, not done. Setting 5, no cases recruited.

**Supplementary Table 4. Household contacts in each setting- detailed results**

|                                         |       |  | Week 1   | Week 2   | Week 3   | Week 4 |
|-----------------------------------------|-------|--|----------|----------|----------|--------|
| <b>Setting 1 emm6</b>                   |       |  |          |          |          |        |
| Case1                                   | HHC1  |  | NEG      | NEG      | NEG      | NEG    |
|                                         | HHC2  |  | NEG      | NEG      | NEG      | NEG    |
| Case 2                                  | HHC1  |  | NEG      | NEG      | NEG      | ND     |
|                                         | HHC2  |  | ND       | NEG      | NEG      | ND     |
| <b>Setting 2 emm1 (M1<sub>UK</sub>)</b> |       |  |          |          |          |        |
| Case 1                                  | HHC1  |  | +        | +        | NEG      |        |
| Case 2                                  | HHC1  |  | NEG      | NEG      | NEG      |        |
|                                         | HHC2  |  | +        | +        | +        |        |
| <b>Setting 4 emm4</b>                   |       |  |          |          |          |        |
| Case 1                                  | HHC1  |  | NEG      | NEG      | NEG      |        |
|                                         | HHC2  |  | NEG      | NEG      | NEG      |        |
|                                         | HHC3  |  | NEG      | NEG      | ND       |        |
| Case 2                                  | HHC 1 |  | NEG      | NEG      | NEG      |        |
|                                         | HHC2  |  | ND       | ND       | NEG      |        |
| Case 3                                  | HHC1  |  | NEG      | NEG      | NEG      |        |
|                                         | HHC2  |  | NEG      | NEG      | NEG      |        |
| <b>Setting 6 emm3.93</b>                |       |  |          |          |          |        |
| Case 1                                  | HHC1  |  | NEG      | NEG      | NEG      |        |
|                                         | HHC2  |  | NEG      | NEG      | +        |        |
| Case 2                                  | HHC1  |  | NEG      | NEG      | ND       |        |
| <b>Overall Household contacts</b>       |       |  |          |          |          |        |
| Participant total                       |       |  | 17       | 17       | 17       | 4      |
| Swabs taken                             |       |  | 15       | 16       | 16       | 2      |
| <i>S. pyogenes</i> positive (%)         |       |  | 2 (13.3) | 2 (12.5) | 2 (12.5) | 0 (0)  |
| Outbreak strain (%)                     |       |  | 2 (13.3) | 2 (12.5) | 2 (12.5) | 0 (0)  |

Positive *S. pyogenes* result indicated by '+'; negative by 'NEG'.  
Abbreviations. HHC, household contact.

**Supplementary Table 5. School contacts in each setting- detailed results**

|                   | <i>S. pyogenes</i> sample results, Number of children<br>(outbreak strain confirmed by <i>emm</i> type or WGS) |                       |                    |                    |                     |         |                  |
|-------------------|----------------------------------------------------------------------------------------------------------------|-----------------------|--------------------|--------------------|---------------------|---------|------------------|
|                   | Week 1                                                                                                         | Week2                 | Week 3             | Week 4             | Week 7/8            | Week 16 | Whole class size |
| <b>Setting 1</b>  |                                                                                                                |                       |                    |                    |                     |         |                  |
| TS Positive       | 3 (3)                                                                                                          | 4 (4)                 | 7 (7)              | 3 <sup>Ψ</sup> (3) |                     |         | 38               |
| TS Negative       | 13                                                                                                             | 9                     | 8                  | 12                 |                     |         |                  |
| TS swab total     | 16                                                                                                             | 13                    | 15                 | 15                 |                     |         |                  |
| Absent/Ref        | 2                                                                                                              | 5                     | 3                  | 3                  |                     |         |                  |
| Participant total | 18                                                                                                             | 18                    | 18                 | 18                 |                     |         |                  |
| <b>Setting 2</b>  |                                                                                                                |                       |                    |                    |                     |         |                  |
| TS Positive       | 0                                                                                                              | 10 (8) <sup>ΨΨΨ</sup> | 8 (6)              | Hol                |                     |         | 29               |
| TS Negative       | 17                                                                                                             | 8                     | 8                  | Hol                |                     |         |                  |
| TS swab total     | 17                                                                                                             | 18                    | 16                 | -                  |                     |         |                  |
| Absent/Ref        | 5                                                                                                              | 4                     | 6                  | Hol                |                     |         |                  |
| Participant total | 22                                                                                                             | 22                    | 22                 | Hol                |                     |         |                  |
| <b>Setting 3</b>  |                                                                                                                |                       |                    |                    |                     |         |                  |
| TS Positive       | 2 (2)                                                                                                          | 6 (6)                 | Hol                | 2 (2)              |                     |         | 59               |
| TS Negative       | 17                                                                                                             | 13                    | Hol                | 18                 |                     |         |                  |
| TS swab total     | 19                                                                                                             | 19                    | -                  | 20                 |                     |         |                  |
| Absent/Ref        | 4                                                                                                              | 4                     | Hol                | 3                  |                     |         |                  |
| Participant total | 23                                                                                                             | 23                    | Hol                | 23                 |                     |         |                  |
| <b>Setting 4</b>  |                                                                                                                |                       |                    |                    |                     |         |                  |
| TS Positive       | 1 (0)                                                                                                          | 4 (4)                 | 4 (4)              |                    |                     | 0       | 40               |
| TS Negative       | 17                                                                                                             | 16                    | 20                 |                    |                     | 18      |                  |
| TS swab total     | 18                                                                                                             | 20                    | 24                 |                    |                     | 18      |                  |
| Cough positive    | 0                                                                                                              | 1 (1)                 | 0                  |                    |                     | ND      |                  |
| Hand positive     | 0                                                                                                              | 0                     | 0                  |                    |                     | ND      |                  |
| Absent/Ref        | 0                                                                                                              | 4                     | 0                  |                    |                     | 7       |                  |
| Participant total | 18                                                                                                             | 24                    | 24                 |                    |                     | 25      |                  |
| <b>Setting 5</b>  |                                                                                                                |                       |                    |                    |                     |         |                  |
| TS Positive       | 0                                                                                                              | 3 (3)                 | 4 (3)              |                    | 5 (3)               |         | 53               |
| TS Negative       | 17                                                                                                             | 19                    | 18                 |                    | 18                  |         |                  |
| TS swab total     | 17                                                                                                             | 22                    | 22                 |                    | 23                  |         |                  |
| Cough positive    | 0                                                                                                              | 0                     | 0                  |                    | ND                  |         |                  |
| Hand positive     | 0                                                                                                              | 0                     | 0                  |                    | ND                  |         |                  |
| Absent/Ref        | 1                                                                                                              | 1                     | 2                  |                    | 1                   |         |                  |
| Participant total | 18                                                                                                             | 23                    | 24                 |                    | 24                  |         |                  |
| <b>Setting 6*</b> |                                                                                                                |                       |                    |                    |                     |         |                  |
| TS Positive       | 7 <sup>Ψ</sup> (6)                                                                                             | 12 <sup>Ψ</sup> (9)   | 9 <sup>Ψ</sup> (6) |                    | 5 <sup>ΨΨ</sup> (3) |         | 59               |
| TS Negative       | 21                                                                                                             | 22                    | 22                 |                    | 25                  |         |                  |
| TS swab total     | 28                                                                                                             | 34                    | 31                 |                    | 30                  |         |                  |
| Cough positive    | 2 (2)                                                                                                          | 3 (3)                 | 2 (2)              |                    | ND                  |         |                  |
| Hand positive     | 1 (1)                                                                                                          | 1 (1)                 | 3 <sup>Ψ</sup> (2) |                    | ND                  |         |                  |
| Absent/Ref        | 2                                                                                                              | 0                     | 4                  |                    | 4                   |         |                  |
| Participant total | 30                                                                                                             | 34                    | 34                 |                    | 34                  |         |                  |

Hatched cells indicate intentional pause in study (Settings 4-6, a break between 3<sup>rd</sup> week and final week was incorporated.)

Hol, unable to sample as school holiday; TS, throat swab; ND, not done;

\*Setting 6; one contact in week 1 with positive throat swab and cough plate was subsequently diagnosed as a case and given antibiotics, with all samples subsequently negative and is shown for completeness; week 3 samples taken at end of week 2 due to school holiday.

Ψ one, ΨΨ two, or ΨΨΨ three samples have no WGS.

**Supplementary Table 6. Surface swab results (settings 1-3, year 1)**

| Setting       | Sample type        | Colony count | Setting | Sample type      | Colony count | Setting | Sample type        | Colony count |
|---------------|--------------------|--------------|---------|------------------|--------------|---------|--------------------|--------------|
| 1             | Construction toy   | 100          | 2       | Activity table   | 350          | 3       | Snack table        | 10,000       |
|               | Construction toy   | 200          |         | Activity table   | 450          |         | Wooden stool       | 1,980        |
|               | Construction toy   | 100          |         | Wooden track*    | 1000         |         | Smartboard screen  | 60           |
|               | Construction toy   | 100          |         | Magnetic letter  | 150          |         | Book               | 100          |
|               | Construction toy   | 150          |         | Magnetic letter  | <25          |         | Magnifier handle   | 340          |
|               | Toy car            | 300          |         | Lego brick       | 100          |         | Ipad screen        | 720          |
|               | Toy car            | 250          |         | Smart screen     | 100          |         | Door handle        | 60           |
|               | Book               | 400          |         | Book             | 200          |         | Small bin          | 400          |
|               | Book               | 200          |         | Book             | 500          |         | Lego table         | 320          |
|               | Large toy car      | 350          |         | iPad             | 950          |         | Activity table     | 1,600        |
|               | Play surface       | 100          |         | iPad             | 1000         |         | Dry wipe pen       | <20          |
|               | Toy animal         | 200          |         | Chair            | 200          |         | Activity table     | 100          |
|               | Toy animal         | 350          |         | Jigsaw piece     | 100          |         | Paint table        | 180          |
|               | Book               | 500          |         | Toy truck        | 250          |         | Glue bottle        | 420          |
|               | Book               | 400          |         | Plastic scissors | 550          |         | Book               | 220          |
|               | Construction parts | 180          |         | Plastic animal   | 200          |         | Toy Screwdriver    | 180          |
|               | Construction parts | 200          |         | Book             | 100          |         | Plastic apron      | 460          |
|               | Toy cooker         | 320          |         | Phonics game     | 3000         |         | Paint brush handle | 1,320        |
|               | Toy shell          | 340          |         | Counting toy     | 200          |         | Toy animal         | 400          |
| Plastic money | 200                | Glue stick   | 200     | Chair            | 380          |         |                    |              |

Colony counts reflect mixed flora. No beta haemolytic streptococci except sample “\*” yielding 5 colonies of *S. pyogenes*



**Supplementary Table 7. SNPs between isolates within each cluster**

| Classes                        | Emm type | PosGene | ID                | Gene Name   | Gene Product                                                | SNP     | Residue   | Type of mutation | Variant prediction |
|--------------------------------|----------|---------|-------------------|-------------|-------------------------------------------------------------|---------|-----------|------------------|--------------------|
| <b>Setting 1</b>               | Emm6     | 155402  | M6_RS00980        | NA          | deoxynucleoside kinase                                      | 135T>C  | Asp45Asp  | Syn              | Low                |
|                                |          | 910654  | M6_RS04595        | <i>guaA</i> | glutamine-hydrolyzing GMP synthase                          | 201C>T  | Tyr67Tyr  | Syn              | Low                |
|                                |          | 1277861 | M6_RS06460        | <i>arcC</i> | carbamate kinase                                            | 279T>C  | Asn93Asn  | Syn              | Low                |
|                                |          | 1323939 | M6_RS06670        | NA          | Glycoside hydrolase family 125 protein                      | 180C>T  | Ser60Ser  | Syn              | Low                |
|                                |          | 1880406 | M6_RS09345        | <i>hasB</i> | UDP-glucose 6-dehydrogenase HasB                            | 172C>T  | Gln58*    | Stop             | High               |
|                                |          | 1881063 | M6_RS09345        | <i>hasB</i> | UDP-glucose 6-dehydrogenase HasB                            | 829C>A  | Gln277Lys | Non-Syn          | Moderate           |
|                                |          | 1894721 | x                 | x           | x                                                           | x       |           | Intragenic       | x                  |
| <b>Setting 2</b>               | Emm1     | 14547   | M5005_RS00060     | NA          | ATP-dependent metallopeptidase FtsH/Yme1/Tma family protein | 1743T>C | Arg581Arg | Syn              | Low                |
|                                |          | 907441  | M5005_RS04580     | <i>guaA</i> | glutamine-hydrolyzing GMP synthase                          | 1540C>T | Pro514Ser | Non-Syn          | Moderate           |
|                                |          | 1011845 | M5005_RS05145     | <i>ssb</i>  | Single-stranded DNA-binding protein                         | 215G>T  | Gly72Val  | Non-Syn          | Moderate           |
|                                |          | 1477185 | M5005_RS07535     | NA          | MptD family putative ECF transporter S Component            | 448A>G  | Thr150Ala | Non-Syn          | Moderate           |
| <b>Setting 3</b>               | Emm1     | 43445   | M5005_RS00285     | <i>purN</i> | phosphoribosylglycinamide formyltransferase                 | 48C>A   | Val16Va   | Syn              | Low                |
|                                |          | 940218  | M5005_RS04730     | NA          | M1 family metallopeptidase                                  | 1098A>G | Pro366Pro | Syn              | Low                |
|                                |          | 1255526 | x                 | x           | x                                                           | x       | x         |                  | intragenic         |
| <b>Setting 4</b>               | Emm4     | None    | None              | None        | None                                                        | None    | None      | None             | None               |
| <b>Setting 5</b>               | Emm4     | None    | None              | None        | None                                                        | None    | None      | None             | None               |
| <b>Setting 6</b>               | Emm3     | 1882546 | SpyM3_1852        | <i>hasB</i> | putative UDP-glucose 6-dehydrogenase                        | 754C>T  | Pro252Ser | Non-Syn          | Moderate           |
| <b>Setting 4 and Setting 6</b> | Emm4     | 899513  | MGAS10750_Spy0941 | NA          | Xaa-His dipeptidase                                         | 1268C>A | Thr423Lys | Non-Syn          | Moderate           |
|                                |          | 1010790 | MGAS10750_Spy1067 | NA          | hypothetical protein                                        | 913G>A  | Asp305Asn | Non-Syn          | Moderate           |
|                                |          | 1026739 | MGAS10750_Spy1079 | NA          | ATPase associated with chromosome architecture/replication  | 121G>A  | Ala41Thr  | Non-Syn          | Moderate           |
|                                |          | 1450398 | MGAS10750_Spy1513 | NA          | PTS system, galactose-specific IIB component                | 62C>T   | Ala21Val  | Non-Syn          | Moderate           |
|                                |          | 1735343 | x                 | x           | x                                                           | x       | x         |                  | Intragenic         |

**Supplementary Table 8 Accession numbers of bacterial genomes from each setting**

| <b>Sample ID</b> | <b>Year</b> | <b>Setting</b> | <b>Source</b> | <b>Sample type</b> | <b>Timepoint (1-4)</b> | <b>emm typing</b> | <b>MLST</b> | <b>Accession*</b> | <b>Unique Name</b> |
|------------------|-------------|----------------|---------------|--------------------|------------------------|-------------------|-------------|-------------------|--------------------|
| A_C1_T_001       | 2019        | Setting 4      | Case          | Throat swab        | 1                      | EMM4.0            | 39          | ERS6110953        | SAMEA8426050       |
| A_C1_T_002       | 2019        | Setting 4      | Case          | Throat swab        | 1                      | EMM4.0            | 39          | ERS6110954        | SAMEA8426051       |
| A_C1_T_003       | 2019        | Setting 4      | Case          | Throat swab        | 1                      | EMM4.0            | 39          | ERS6110955        | SAMEA8426052       |
| A_C1_T_008       | 2019        | Setting 4      | Case          | Throat swab        | 2                      | EMM4.0            | 39          | ERS6110956        | SAMEA8426053       |
| A_C1_T_106       | 2019        | Setting 4      | Case          | Throat swab        | 4                      | EMM6.0            | 382         | ERS6110957        | SAMEA8426054       |
| A_CC18_C_008     | 2019        | Setting 4      | CC            | Cough plate        | 2                      | EMM4.0            | 39          | ERS6110958        | SAMEA8426055       |
| A_CC18_T_008     | 2019        | Setting 4      | CC            | Throat swab        | 2                      | EMM4.0            | 39          | ERS6110959        | SAMEA8426056       |
| A_CC18_T_015     | 2019        | Setting 4      | CC            | Throat swab        | 3                      | EMM4.0            | 39          | ERS6110960        | SAMEA8426057       |
| A_CC22_T_008     | 2019        | Setting 4      | CC            | Throat swab        | 2                      | EMM4.0            | 39          | ERS6110961        | SAMEA8426058       |
| A_CC22_T_015     | 2019        | Setting 4      | CC            | Throat swab        | 3                      | EMM4.0            | 39          | ERS6110962        | SAMEA8426059       |
| A_CC27_T_008     | 2019        | Setting 4      | CC            | Throat swab        | 2                      | EMM4.0            | 39          | ERS6110963        | SAMEA8426060       |
| A_CC27_T_015     | 2019        | Setting 4      | CC            | Throat swab        | 3                      | EMM4.0            | 39          | ERS6110964        | SAMEA8426061       |
| A_CC28_T_008     | 2019        | Setting 4      | CC            | Throat swab        | 2                      | EMM4.0            | 39          | ERS6110965        | SAMEA8426062       |
| A_CC28_T_015     | 2019        | Setting 4      | CC            | Throat swab        | 3                      | EMM4.0            | 39          | ERS6110966        | SAMEA8426063       |
| A_CC31_T_001     | 2019        | Setting 4      | CC            | Throat swab        | 1                      | EMM89.0           | 101         | ERS6110967        | SAMEA8426064       |
| B_CC05_T_008     | 2019        | Setting 5      | CC            | Throat swab        | 3                      | EMM12.0           | 36          | ERS6110968        | SAMEA8426065       |
| B_CC05_T_046     | 2019        | Setting 5      | CC            | Throat swab        | 4                      | EMM12.0           | 36          | ERS6110969        | SAMEA8426066       |
| B_CC21_T_046     | 2019        | Setting 5      | CC            | Throat swab        | 4                      | EMM2.0            | 55          | ERS6110970        | SAMEA8426067       |
| B_CC22_T_008     | 2019        | Setting 5      | CC            | Throat swab        | 3                      | EMM4.0            | 39          | ERS6110971        | SAMEA8426068       |
| B_CC22_T_046     | 2019        | Setting 5      | CC            | Throat swab        | 4                      | EMM4.0            | 39          | ERS6110972        | SAMEA8426069       |
| B_CC34_T_001     | 2019        | Setting 5      | CC            | Throat swab        | 2                      | EMM4.0            | 39          | ERS6110973        | SAMEA8426070       |
| B_CC34_T_008     | 2019        | Setting 5      | CC            | Throat swab        | 3                      | EMM4.0            | 39          | ERS6110974        | SAMEA8426071       |
| B_CC41_T_001     | 2019        | Setting 5      | CC            | Throat swab        | 2                      | EMM4.0            | 39          | ERS6110975        | SAMEA8426072       |
| B_CC44_T_001     | 2019        | Setting 5      | CC            | Throat swab        | 2                      | EMM4.0            | 39          | ERS6110976        | SAMEA8426073       |
| B_CC44_T_008     | 2019        | Setting 5      | CC            | Throat swab        | 3                      | EMM4.0            | 39          | ERS6110977        | SAMEA8426074       |
| B_CC44_T_046     | 2019        | Setting 5      | CC            | Throat swab        | 4                      | EMM4.0            | 39          | ERS6110978        | SAMEA8426075       |
| B_CC49_T_046     | 2019        | Setting 5      | CC            | Throat swab        | 4                      | EMM4.0            | 39          | ERS6110979        | SAMEA8426076       |
| B_E4_S_001       | 2019        | Setting 5      | Air           | Settle plate       | 2                      | EMM4.0            | 39          | ERS6110980        | SAMEA8426077       |
| B_E4_S_008       | 2019        | Setting 5      | Air           | Settle plate       | 3                      | EMM4.0            | 39          | ERS6110981        | SAMEA8426078       |

|              |      |           |      |             |   |         |     |            |              |
|--------------|------|-----------|------|-------------|---|---------|-----|------------|--------------|
| C_C1_T_010   | 2019 | Setting 6 | Case | Throat swab | 3 | EMM3.93 | 315 | ERS6110982 | SAMEA8426079 |
| C_C1_T_046   | 2019 | Setting 6 | Case | Throat swab | 4 | EMM3.93 | 315 | ERS6110983 | SAMEA8426080 |
| C_C2_T_010   | 2019 | Setting 6 | Case | Throat swab | 3 | EMM3.93 | 315 | ERS6110984 | SAMEA8426081 |
| C_C1_T_007   | 2019 | Setting 6 | Case | Throat swab | 2 | EMM3.93 | 315 | ERS6110985 | SAMEA8426082 |
| C_CC02_T_007 | 2019 | Setting 6 | CC   | Throat swab | 2 | EMM3.93 | 315 | ERS6110986 | SAMEA8426083 |
| C_CC07_T_007 | 2019 | Setting 6 | CC   | Throat swab | 2 | EMM4.0  | 39  | ERS6110987 | SAMEA8426084 |
| C_CC09_C_007 | 2019 | Setting 6 | CC   | Cough plate | 2 | EMM3.93 | 315 | ERS6110988 | SAMEA8426085 |
| C_CC09_H_010 | 2019 | Setting 6 | CC   | Hand swab   | 3 | EMM3.93 | 315 | ERS6110989 | SAMEA8426086 |
| C_CC09_T_007 | 2019 | Setting 6 | CC   | Throat swab | 2 | EMM3.93 | 315 | ERS6110990 | SAMEA8426087 |
| C_CC13_T_007 | 2019 | Setting 6 | CC   | Throat swab | 2 | EMM3.93 | 315 | ERS6110991 | SAMEA8426088 |
| C_CC13_T_046 | 2019 | Setting 6 | CC   | Throat swab | 4 | EMM3.93 | 315 | ERS6110992 | SAMEA8426089 |
| C_CC14_C_001 | 2019 | Setting 6 | CC   | Cough plate | 1 | EMM3.93 | 315 | ERS6110993 | SAMEA8426090 |
| C_CC14_T_001 | 2019 | Setting 6 | CC   | Throat swab | 1 | EMM3.93 | 315 | ERS6110994 | SAMEA8426091 |
| C_CC15_C_007 | 2019 | Setting 6 | CC   | Cough plate | 2 | EMM3.93 | 315 | ERS6110995 | SAMEA8426092 |
| C_CC15_H_010 | 2019 | Setting 6 | CC   | Hand swab   | 3 | EMM3.93 | 315 | ERS6110996 | SAMEA8426093 |
| C_CC15_T_007 | 2019 | Setting 6 | CC   | Throat swab | 2 | EMM3.93 | 315 | ERS6110997 | SAMEA8426094 |
| C_CC15_T_010 | 2019 | Setting 6 | CC   | Throat swab | 3 | EMM3.93 | 315 | ERS6110998 | SAMEA8426095 |
| C_CC15_T_046 | 2019 | Setting 6 | CC   | Throat swab | 4 | EMM3.93 | 315 | ERS6110999 | SAMEA8426096 |
| C_CC16_T_010 | 2019 | Setting 6 | CC   | Throat swab | 3 | EMM3.93 | 315 | ERS6111000 | SAMEA8426097 |
| C_CC21_T_010 | 2019 | Setting 6 | CC   | Throat swab | 3 | EMM3.93 | 315 | ERS6111001 | SAMEA8426098 |
| C_CC22_T_001 | 2019 | Setting 6 | CC   | Throat swab | 1 | EMM3.93 | 315 | ERS6111002 | SAMEA8426099 |
| C_CC22_T_007 | 2019 | Setting 6 | CC   | Throat swab | 2 | EMM3.93 | 315 | ERS6111003 | SAMEA8426100 |
| C_CC24_T_007 | 2019 | Setting 6 | CC   | Throat swab | 2 | EMM3.93 | 315 | ERS6111004 | SAMEA8426101 |
| C_CC28_T_001 | 2019 | Setting 6 | CC   | Throat swab | 1 | EMM4.0  | 39  | ERS6111005 | SAMEA8426102 |
| C_CC28_T_007 | 2019 | Setting 6 | CC   | Throat swab | 2 | EMM4.0  | 39  | ERS6111006 | SAMEA8426103 |
| C_CC34_T_010 | 2019 | Setting 6 | CC   | Throat swab | 3 | EMM4.0  | 39  | ERS6111007 | SAMEA8426104 |
| C_CC38_C_010 | 2019 | Setting 6 | CC   | Cough plate | 3 | EMM3.93 | 315 | ERS6111008 | SAMEA8426105 |
| C_CC38_T_001 | 2019 | Setting 6 | CC   | Throat swab | 1 | EMM3.93 | 315 | ERS6111009 | SAMEA8426106 |
| C_CC38_T_007 | 2019 | Setting 6 | CC   | Throat swab | 2 | EMM3.93 | 315 | ERS6111010 | SAMEA8426107 |
| C_CC38_T_010 | 2019 | Setting 6 | CC   | Throat swab | 3 | EMM3.93 | 315 | ERS6111011 | SAMEA8426108 |
| C_CC39_T_007 | 2019 | Setting 6 | CC   | Throat swab | 2 | EMM3.93 | 315 | ERS6111012 | SAMEA8426109 |

|              |      |           |      |              |   |          |     |            |              |
|--------------|------|-----------|------|--------------|---|----------|-----|------------|--------------|
| C_CC42_C_001 | 2019 | Setting 6 | CC   | Cough plate  | 1 | EMM3.93  | 315 | ERS6111013 | SAMEA8426110 |
| C_CC42_C_007 | 2019 | Setting 6 | CC   | Cough plate  | 2 | EMM3.93  | 315 | ERS6111014 | SAMEA8426111 |
| C_CC42_C_010 | 2019 | Setting 6 | CC   | Cough plate  | 3 | EMM3.93  | 315 | ERS6111015 | SAMEA8426112 |
| C_CC42_H_001 | 2019 | Setting 6 | CC   | Hand swab    | 1 | EMM3.93  | 315 | ERS6111016 | SAMEA8426113 |
| C_CC42_H_007 | 2019 | Setting 6 | CC   | Hand swab    | 2 | EMM3.93  | 315 | ERS6111017 | SAMEA8426114 |
| C_CC42_T_007 | 2019 | Setting 6 | CC   | Throat swab  | 2 | EMM3.93  | 315 | ERS6111018 | SAMEA8426115 |
| C_CC42_T_010 | 2019 | Setting 6 | CC   | Throat swab  | 3 | EMM3.93  | 315 | ERS6111019 | SAMEA8426116 |
| C_CC51_T_010 | 2019 | Setting 6 | CC   | Throat swab  | 3 | EMM1.0   | 28  | ERS6111020 | SAMEA8426117 |
| C_CC55_T_001 | 2019 | Setting 6 | CC   | Throat swab  | 1 | EMM3.93  | 315 | ERS6111021 | SAMEA8426118 |
| C_CC55_T_010 | 2019 | Setting 6 | CC   | Throat swab  | 3 | EMM3.143 | 315 | ERS6111022 | SAMEA8426119 |
| C_CC58_T_001 | 2019 | Setting 6 | CC   | Throat swab  | 1 | EMM3.93  | 315 | ERS6111023 | SAMEA8426120 |
| C_CC58_T_046 | 2019 | Setting 6 | CC   | Throat swab  | 4 | EMM3.93  | 315 | ERS6111024 | SAMEA8426121 |
| C_E1_S_001   | 2019 | Setting 6 | Air  | Settle plate | 1 | EMM3.93  | 315 | ERS6111025 | SAMEA8426122 |
| C_E1_S_007   | 2019 | Setting 6 | Air  | Settle plate | 2 | EMM3.93  | 315 | ERS6111026 | SAMEA8426123 |
| C_E1_S_010   | 2019 | Setting 6 | Air  | Settle plate | 3 | EMM3.93  | 315 | ERS6111027 | SAMEA8426124 |
| C_E3_S_001   | 2019 | Setting 6 | Air  | Settle plate | 1 | EMM3.93  | 315 | ERS6111028 | SAMEA8426125 |
| C_E4_S_007   | 2019 | Setting 6 | Air  | Settle plate | 2 | EMM3.93  | 315 | ERS6111029 | SAMEA8426126 |
| C_E4_S_010   | 2019 | Setting 6 | Air  | Settle plate | 3 | EMM3.93  | 315 | ERS6111030 | SAMEA8426127 |
| C_H2_T_010   | 2019 | Setting 6 | HHC  | Throat swab  | 3 | EMM3.93  | 315 | ERS6111031 | SAMEA8426128 |
| A_C1_T_W     | 2018 | Setting 1 | Case | Throat swab  | 0 | EMM6.0   | 382 | ERS6111032 | SAMEA8426129 |
| A_CC00_T_W1  | 2018 | Setting 1 | CC   | Throat swab  | 1 | EMM6.0   | 382 | ERS6111033 | SAMEA8426130 |
| A_CC00_T_W3  | 2018 | Setting 1 | CC   | Throat swab  | 3 | EMM6.0   | 382 | ERS6111034 | SAMEA8426131 |
| A_CC11_T_W1  | 2018 | Setting 1 | CC   | Throat swab  | 1 | EMM6.0   | 382 | ERS6111035 | SAMEA8426132 |
| A_CC11_T_W2  | 2018 | Setting 1 | CC   | Throat swab  | 2 | EMM6.0   | 382 | ERS6111036 | SAMEA8426133 |
| A_CC04_T_W2  | 2018 | Setting 1 | CC   | Throat swab  | 2 | EMM6.0   | 382 | ERS6111037 | SAMEA8426134 |
| A_CC04_T_W3  | 2018 | Setting 1 | CC   | Throat swab  | 3 | EMM6.0   | 382 | ERS6111038 | SAMEA8426135 |
| A_CC08_T_W3  | 2018 | Setting 1 | CC   | Throat swab  | 3 | EMM6.0   | 382 | ERS6111039 | SAMEA8426136 |
| A_CC09_T_W3  | 2018 | Setting 1 | CC   | Throat swab  | 3 | EMM6.0   | 382 | ERS6111040 | SAMEA8426137 |
| A_CC09_T_W4  | 2018 | Setting 1 | CC   | Throat swab  | 4 | EMM6.0   | 382 | ERS6111041 | SAMEA8426138 |
| A_CC10_T_W1  | 2018 | Setting 1 | CC   | Throat swab  | 1 | EMM6.9   | 382 | ERS6111042 | SAMEA8426139 |
| A_CC13_T_W2  | 2018 | Setting 1 | CC   | Throat swab  | 2 | EMM6.0   | 382 | ERS6111043 | SAMEA8426140 |
| A_CC13_T_W3  | 2018 | Setting 1 | CC   | Throat swab  | 3 | EMM6.0   | 382 | ERS6111044 | SAMEA8426141 |
| A_CC13_T_W4  | 2018 | Setting 1 | CC   | Throat swab  | 4 | EMM6.0   | 382 | ERS6111045 | SAMEA8426142 |

|              |      |           |      |             |   |         |     |            |              |
|--------------|------|-----------|------|-------------|---|---------|-----|------------|--------------|
| A_CC14_T_W3  | 2018 | Setting 1 | CC   | Throat swab | 3 | EMM6.0  | 382 | ERS6111046 | SAMEA8426143 |
| A_CC15_T_W2  | 2018 | Setting 1 | CC   | Throat swab | 2 | EMM6.0  | 382 | ERS6111047 | SAMEA8426144 |
| A_CC15_T_W3  | 2018 | Setting 1 | CC   | Throat swab | 3 | EMM6.0  | 382 | ERS6111048 | SAMEA8426145 |
| B_C1_C_W3    | 2018 | Setting 2 | Case | Cough plate | 3 | EMM1.0  | 28  | ERS6111049 | SAMEA8426146 |
| B_C1_H_W3    | 2018 | Setting 2 | Case | Hand swab   | 3 | EMM1.0  | 28  | ERS6111050 | SAMEA8426147 |
| B_C1_T_W3    | 2018 | Setting 2 | Case | Throat swab | 3 | EMM1.0  | 28  | ERS6111051 | SAMEA8426148 |
| B_C2_T_W3    | 2018 | Setting 2 | Case | Throat swab | 3 | EMM1.0  | 28  | ERS6111052 | SAMEA8426149 |
| B_C1_HH_W1   | 2018 | Setting 2 | HHC  | Household   | 1 | EMM1.0  | 28  | ERS6111053 | SAMEA8426150 |
| B_C2_HH_W1   | 2018 | Setting 2 | HHC  | Household   | 1 | EMM1.0  | 28  | ERS6111054 | SAMEA8426151 |
| B_C1_HH_W2   | 2018 | Setting 2 | HHC  | Household   | 2 | EMM1.0  | 28  | ERS6111055 | SAMEA8426152 |
| B_C2_HH_W2   | 2018 | Setting 2 | HHC  | Household   | 2 | EMM1.0  | 28  | ERS6111056 | SAMEA8426153 |
| B_C2_HH_W3   | 2018 | Setting 2 | HHC  | Household   | 3 | EMM1.0  | 28  | ERS6111057 | SAMEA8426154 |
| B_CC01_T_W2  | 2018 | Setting 2 | CC   | Throat swab | 2 | EMM1.0  | 28  | ERS6111058 | SAMEA8426155 |
| B_CC04_T_W2  | 2018 | Setting 2 | CC   | Throat swab | 2 | EMM1.0  | 28  | ERS6111059 | SAMEA8426156 |
| B_CC04_T_W3  | 2018 | Setting 2 | CC   | Throat swab | 3 | EMM1.0  | 28  | ERS6111060 | SAMEA8426157 |
| B_CC06_T_W2  | 2018 | Setting 2 | CC   | Throat swab | 2 | EMM1.0  | 28  | ERS6111061 | SAMEA8426158 |
| B_CC06_T_W3  | 2018 | Setting 2 | CC   | Throat swab | 3 | EMM1.0  | 28  | ERS6111062 | SAMEA8426159 |
| B_CC08_T_W2  | 2018 | Setting 2 | CC   | Throat swab | 2 | EMM1.0  | 28  | ERS6111063 | SAMEA8426160 |
| B_CC08_T_W3  | 2018 | Setting 2 | CC   | Throat swab | 3 | EMM1.0  | 28  | ERS6111064 | SAMEA8426161 |
| B_CC09_T_W3  | 2018 | Setting 2 | CC   | Throat swab | 3 | EMM1.0  | 28  | ERS6111065 | SAMEA8426162 |
| B_CC10_T_W2  | 2018 | Setting 2 | CC   | Throat swab | 2 | EMM1.0  | 28  | ERS6111066 | SAMEA8426163 |
| B_CC10_T_W3  | 2018 | Setting 2 | CC   | Throat swab | 3 | EMM1.0  | 28  | ERS6111067 | SAMEA8426164 |
| B_CC11_T_W2  | 2018 | Setting 2 | CC   | Throat swab | 2 | EMM12.0 | 36  | ERS6111068 | SAMEA8426165 |
| B_CC11_T_W3  | 2018 | Setting 2 | CC   | Throat swab | 3 | EMM12.0 | 36  | ERS6111069 | SAMEA8426166 |
| B_CC14_T_W2  | 2018 | Setting 2 | CC   | Throat swab | 2 | EMM1.0  | 28  | ERS6111070 | SAMEA8426167 |
| B_CC14_T_W3  | 2018 | Setting 2 | CC   | Throat swab | 3 | EMM1.0  | 28  | ERS6111071 | SAMEA8426168 |
| B_CC19_T_W3  | 2018 | Setting 2 | CC   | Throat swab | 3 | EMM6.0  | 382 | ERS6111072 | SAMEA8426169 |
| B_E1_Ty_W    | 2018 | Setting 2 | Toy  | Toys        | 1 | EMM1.0  | 28  | ERS6111073 | SAMEA8426170 |
| B_E2_Ty_W    | 2018 | Setting 2 | Toy  | Toys        | 1 | EMM1.0  | 28  | ERS6111074 | SAMEA8426171 |
| B_E3_Ty_W    | 2018 | Setting 2 | Toy  | Toys        | 1 | EMM1.0  | 28  | ERS6111075 | SAMEA8426172 |
| B_E4_Ty_W    | 2018 | Setting 2 | Toy  | Toys        | 1 | EMM1.0  | 28  | ERS6111076 | SAMEA8426173 |
| B_E5_Ty_W    | 2018 | Setting 2 | Toy  | Toys        | 1 | EMM1.0  | 28  | ERS6111077 | SAMEA8426174 |
| BR_CC12_T_W2 | 2018 | Setting 3 | CC   | Throat swab | 2 | EMM1.0  | 28  | ERS6111078 | SAMEA8426175 |

|                |      |           |    |             |   |        |    |            |              |
|----------------|------|-----------|----|-------------|---|--------|----|------------|--------------|
| BR_CC12_T_W4   | 2018 | Setting 3 | CC | Throat swab | 4 | EMM1.0 | 28 | ERS6111079 | SAMEA8426176 |
| BR_CC17_T_W1   | 2018 | Setting 3 | CC | Throat swab | 1 | EMM1.0 | 28 | ERS6111080 | SAMEA8426177 |
| BR_CC17_T_W1_2 | 2018 | Setting 3 | CC | Throat swab | 2 | EMM1.0 | 28 | ERS6111081 | SAMEA8426178 |
| BR_CC17_T_W2   | 2018 | Setting 3 | CC | Throat swab | 2 | EMM1.0 | 28 | ERS6111082 | SAMEA8426179 |
| BR_CC18_T_W2   | 2018 | Setting 3 | CC | Throat swab | 2 | EMM1.0 | 28 | ERS6111083 | SAMEA8426180 |
| BR_CC19_T_W2   | 2018 | Setting 3 | CC | Throat swab | 2 | EMM1.0 | 28 | ERS6111084 | SAMEA8426181 |
| BR_CC19_T_W2_2 | 2018 | Setting 3 | CC | Throat swab | 3 | EMM1.0 | 28 | ERS6111085 | SAMEA8426182 |
| BR_CC20_T_W2   | 2018 | Setting 3 | CC | Throat swab | 2 | EMM1.0 | 28 | ERS6111086 | SAMEA8426183 |
| BR_CC21_T_W2   | 2018 | Setting 3 | CC | Throat swab | 2 | EMM1.0 | 28 | ERS6111087 | SAMEA8426184 |

\*Genomes uploaded to ENA, project PRJEB43915. Timepoints and samples listed in supplementary tables 3-5.

**Supplementary Table 9. Genomes from Chalker *et al* (reference 3) used for analysis**

| Reference  | emm    | MLST |
|------------|--------|------|
| ERR1359668 | EMM1.0 | 28   |
| ERR1359632 | EMM1.0 | 28   |
| ERR1359833 | EMM1.0 | 28   |
| ERR1359407 | EMM1.0 | 28   |
| ERR1359854 | EMM1.0 | 28   |
| ERR1359412 | EMM1.0 | 28   |
| ERR1359400 | EMM1.0 | 28   |
| ERR1359441 | EMM1.0 | 28   |
| ERR1359627 | EMM1.0 | 28   |
| ERR1359582 | EMM1.0 | 28   |
| ERR1359530 | EMM1.0 | 28   |
| ERR1359469 | EMM1.0 | 28   |
| ERR1359819 | EMM1.0 | 28   |
| ERR1359663 | EMM1.0 | 28   |
| ERR1359370 | EMM1.0 | 28   |
| ERR1359672 | EMM1.0 | 28   |
| ERR1359419 | EMM1.0 | 28   |
| ERR1359337 | EMM1.0 | 28   |
| ERR1359866 | EMM1.0 | 28   |
| ERR1359373 | EMM1.0 | 28   |
| ERR1359723 | EMM1.0 | 28   |
| ERR1359547 | EMM1.0 | 28   |
| ERR1359825 | EMM1.0 | 28   |
| ERR1359454 | EMM1.0 | 28   |
| ERR1359440 | EMM1.0 | 28   |
| ERR1359420 | EMM1.0 | 28   |
| ERR1359732 | EMM1.0 | 28   |
| ERR1359644 | EMM1.0 | 28   |
| ERR1359427 | EMM1.0 | 28   |
| ERR1359613 | EMM1.0 | 28   |
| ERR1359670 | EMM1.0 | 28   |
| ERR1359402 | EMM1.0 | 28   |
| ERR1359385 | EMM1.0 | 28   |

| Reference  | emm     | MLST |
|------------|---------|------|
| ERR1359861 | EMM3.93 | 315  |
| ERR1359681 | EMM3.93 | 315  |
| ERR1359480 | EMM3.93 | 315  |
| ERR1359372 | EMM3.93 | 315  |
| ERR1359661 | EMM3.93 | 315  |
| ERR1359512 | EMM3.93 | 315  |
| ERR1359363 | EMM3.93 | 315  |
| ERR1359677 | EMM3.93 | 315  |
| ERR1359532 | EMM3.93 | 315  |
| ERR1359820 | EMM3.93 | 315  |
| ERR1359796 | EMM3.93 | 315  |
| ERR1359777 | EMM3.93 | 315  |
| ERR1359858 | EMM3.93 | 315  |
| ERR1359848 | EMM3.93 | 315  |
| ERR1359759 | EMM3.93 | 315  |
| ERR1359485 | EMM3.93 | 315  |
| ERR1359393 | EMM3.93 | 315  |
| ERR1359603 | EMM3.93 | 315  |
| ERR1359657 | EMM3.93 | 315  |
| ERR1359341 | EMM3.93 | 315  |
| ERR1359787 | EMM3.93 | 315  |
| ERR1359699 | EMM3.93 | 315  |
| ERR1359708 | EMM3.93 | 315  |
| ERR1359862 | EMM3.93 | 315  |
| ERR1359731 | EMM3.93 | 315  |
| ERR1359502 | EMM3.93 | 315  |
| ERR1359763 | EMM3.93 | 315  |
| ERR1359601 | EMM3.93 | 315  |

| Reference  | emm    | MLST |
|------------|--------|------|
| ERR1359656 | EMM4.0 | 39   |
| ERR1359513 | EMM4.0 | 39   |
| ERR1359639 | EMM4.0 | 39   |
| ERR1359353 | EMM4.0 | 39   |
| ERR1359593 | EMM4.0 | 39   |
| ERR1359508 | EMM4.0 | 39   |
| ERR1359808 | EMM4.0 | 39   |
| ERR1359491 | EMM4.0 | 39   |
| ERR1359749 | EMM4.0 | 39   |
| ERR1359783 | EMM4.0 | 39   |
| ERR1359660 | EMM4.0 | 39   |
| ERR1359633 | EMM4.0 | 39   |
| ERR1359450 | EMM4.0 | 39   |
| ERR1359357 | EMM4.0 | 39   |
| ERR1359543 | EMM4.0 | 39   |
| ERR1359424 | EMM4.0 | 39   |
| ERR1359678 | EMM4.0 | 39   |
| ERR1359788 | EMM4.0 | 39   |
| ERR1359446 | EMM4.0 | 39   |
| ERR1359637 | EMM4.0 | 39   |
| ERR1359576 | EMM4.0 | 39   |
| ERR1359765 | EMM4.0 | 39   |
| ERR1359339 | EMM4.0 | 39   |
| ERR1359847 | EMM4.0 | 39   |
| ERR1359662 | EMM4.0 | 39   |
| ERR1359533 | EMM4.0 | 39   |
| ERR1359643 | EMM4.0 | 39   |

| Reference  | emm    | MLST |
|------------|--------|------|
| ERR1359623 | EMM6.0 | 382  |
| ERR1359694 | EMM6.0 | 382  |
| ERR1359838 | EMM6.0 | 382  |
| ERR1359664 | EMM6.0 | 382  |
| ERR1359461 | EMM6.0 | 382  |
| ERR1359444 | EMM6.0 | 382  |
| ERR1359767 | EMM6.0 | 382  |
| ERR1359756 | EMM6.0 | 382  |
| ERR1359829 | EMM6.0 | 382  |
| ERR1359333 | EMM6.0 | 382  |
| ERR1359426 | EMM6.0 | 382  |
| ERR1359733 | EMM6.0 | 382  |
| ERR1359343 | EMM6.0 | 382  |
| ERR1359867 | EMM6.0 | 382  |
| ERR1359883 | EMM6.0 | 382  |
| ERR1359640 | EMM6.0 | 382  |
| ERR1359735 | EMM6.0 | 382  |
| ERR1359466 | EMM6.0 | 382  |
| ERR1359527 | EMM6.0 | 382  |

## Supplementary Figures

### Supplementary Figure S1- Phylogenetic relationship between *S. pyogenes emm6* strains from outbreak setting 1.

**A)** Maximum likelihood phylogenetic tree was constructed from recombination-free 270 core SNPs extracted after mapping 17 *S. pyogenes* isolates collected from setting 1 (S1), single isolates from settings 2 and 4 (S2 and S4), and 19 *emm6.0* scarlet fever isolates from previously published scarlet fever study in the UK (Chalker *et al.* ref 3), indicated with grey circles, to the complete *emm6* reference strain MGAS10394 (NC\_006086). Isolate source is indicated by specific shape at the end of the branch. CC (classroom contact). Settings are colour coded as indicated in the key legend. All study isolates were *emm6.0*, bar one isolate from Setting 1, *emm6.9*, which is separated from the rest of the setting 1 isolates by 40-43 SNPs. **B)** Phylogenetic tree of 16 *emm6.0* samples from the outbreak in setting 1. Settings and sample source are colour and shape-coded as indicated in panel A. Samples of the same type (source) that are 0 SNP apart are plotted together (one on top of the other). Scale bar indicates nucleotide substitutions per site.

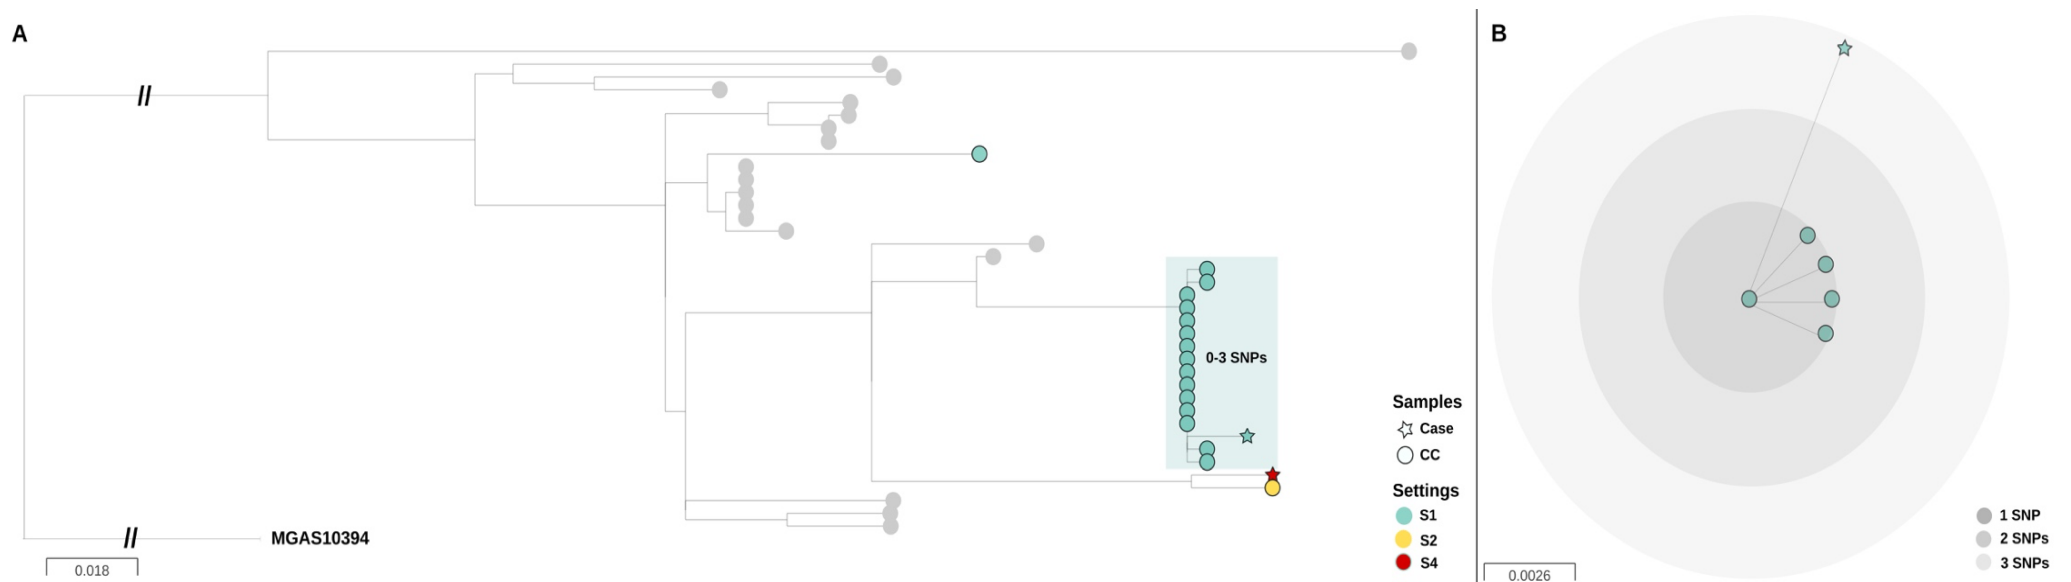



### Supplementary Figure S2. Phylogenetic tree of *S. pyogenes emm1* strains from outbreak settings 2 and 3.

**A)** Maximum likelihood phylogenetic tree constructed from recombination-free 392 core SNPs extracted after mapping 37 *S. pyogenes emm1.0* isolates collected from settings 2 and 3 (S2, S3), a single isolate from setting 6 (S6); and 33 *emm1.0* scarlet fever isolates from previously published scarlet fever study in the UK (Chalker *et al.* ref 3), indicated with grey circles, to the complete *emm1* reference strain MGAS5005 (CP000017). Sample source is indicated by a specific shape at the end of each branch. CC, classroom contact; HHC, household contact. Settings are colour coded as indicated in the key legend. **B)** Phylogenetic tree of 23 *emm1* isolates from setting 2. **C)** Phylogenetic tree of 10 *emm1* isolates from setting 3 and two closely related isolates from setting 2. For panels B and C, settings and sample source are colour and shape-coded as indicated in panel A. Isolates from the same sample types that are 0 SNP apart are plotted together; isolates from different sample types with 0 SNP apart are plotted side-by-side to facilitate visualization. Scale bar indicates nucleotide substitutions per site.

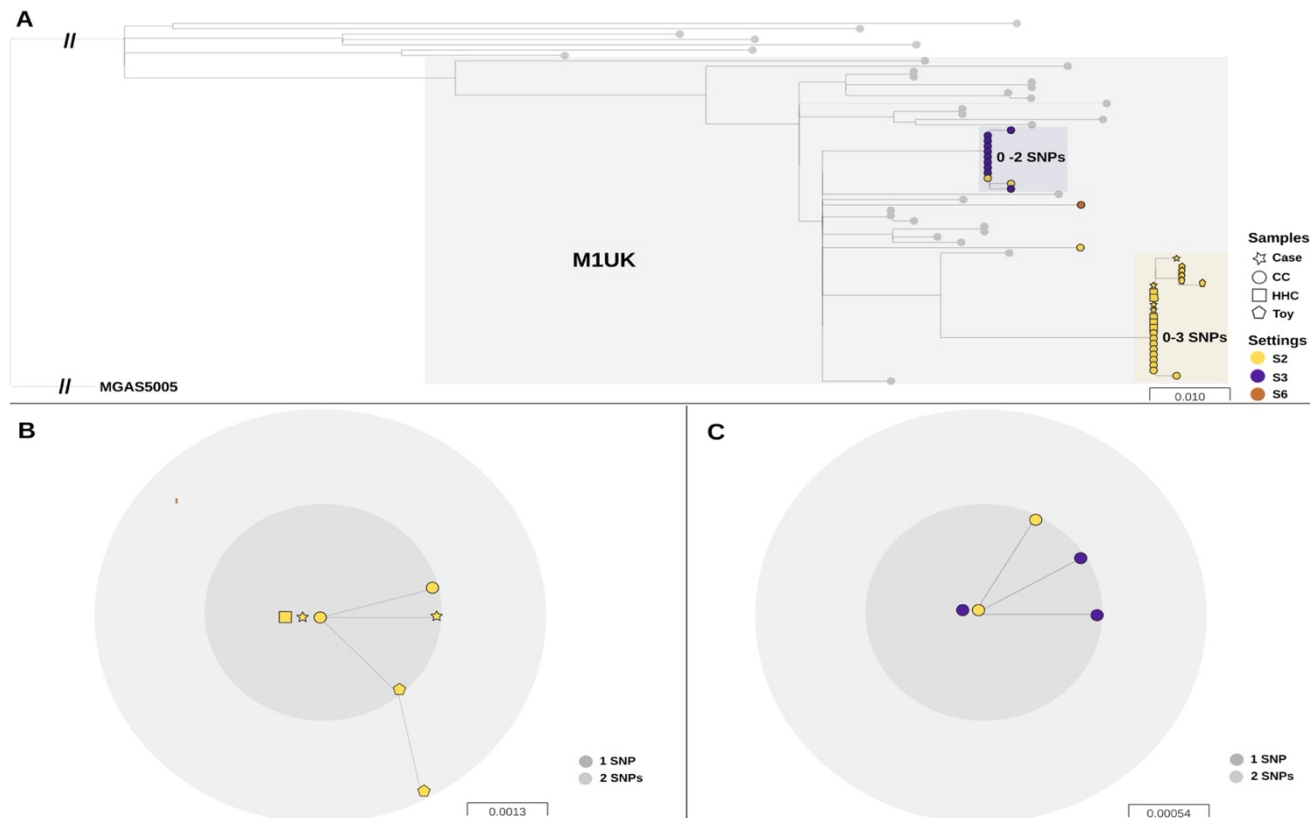

**Supplementary Figure S3. Phylogenetic relationship between *S. pyogenes emm4* strains from outbreak settings 4 and 5.**

**A)** Maximum likelihood phylogenetic tree constructed from recombination-free 1,005 core SNPs extracted after mapping 51 *S. pyogenes emm4.0* isolates collected from settings 4 and 5 (S4, S5); 4 *emm4.0* isolates from setting 6 (S6); and 27 *emm4.0* scarlet fever isolates from previously published scarlet fever study in the UK (Chalker *et al.* ref 3), indicated with grey circles to the complete *emm4* reference strain MGAS10750 (NC\_008024). Sample source is indicated by the shape at the end of each branch. CC, classroom contact; Air, environmental settle plate. Settings are colour coded as indicated in the key legend. **B)** Phylogenetic tree of 14 *emm4.0* isolates from setting 4 outbreak and 4 classroom contact samples from setting 6 that were related with up to 3 SNPs difference between the isolates. Settings and sample source are colour and shape-coded as indicated in panel A. Isolates from the same sample types that are 0 SNP apart are plotted together; isolates from different sample types that are 0 SNP apart are plotted side-by-side to facilitate visualization. For setting 5 and setting 4 similar visualization was not performed as no core SNPs differences were detected within the outbreak strains. Scale bar indicates nucleotide substitutions per site.

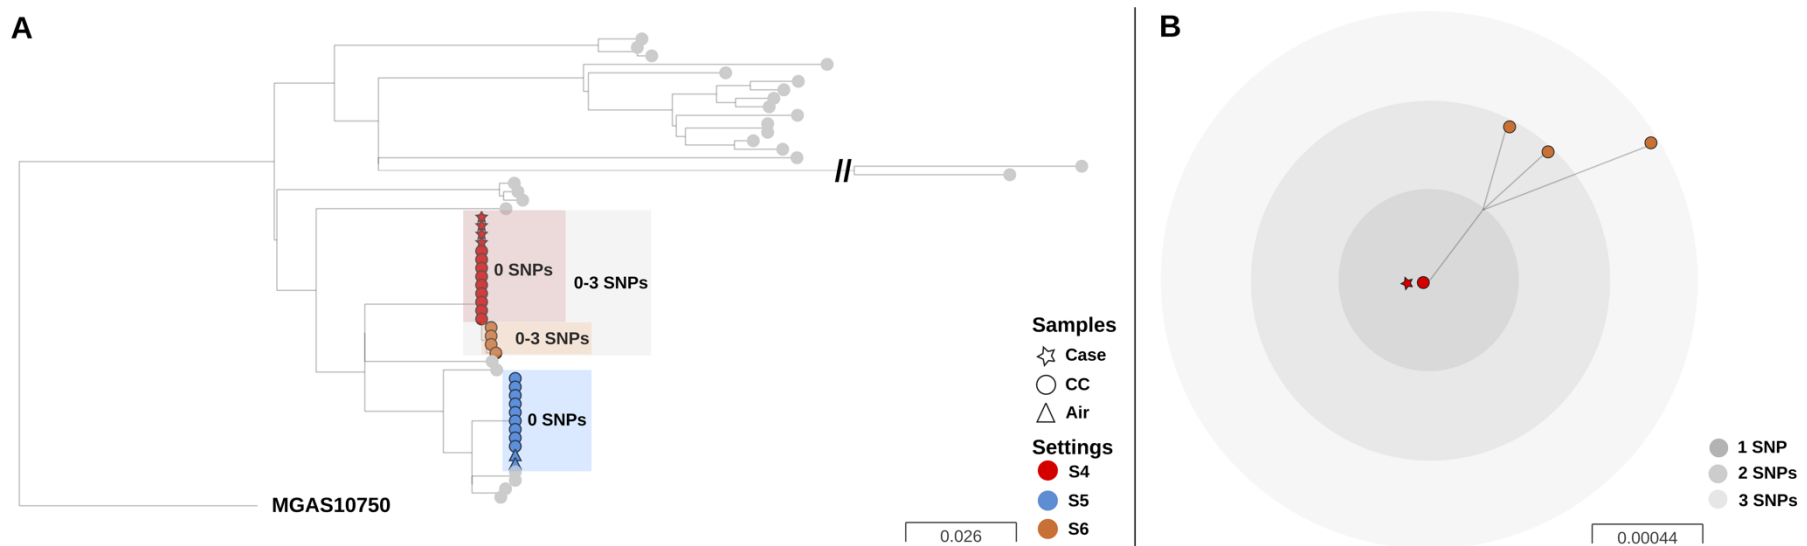

**Supplementary Figure S4. Phylogenetic relationship between *S. pyogenes emm3* strains from outbreak setting 6.**

**A)** Maximum likelihood phylogenetic tree constructed from recombination-free 215 core SNPs extracted after mapping 44 *S. pyogenes emm 3.93* isolates and one 3.143 isolate collected from one setting (S6) and 28 *emm 3.93* scarlet fever isolates from previously published scarlet fever study in the UK (Chalker *et al.* ref 3), indicated with grey circles, to the complete *emm3* reference strain MGAS315 (NC\_004070). Sample source is indicated by the shape at the end of each branch. CC, classroom contact; HHC, household contact; Air, environmental settle plate. Setting colour coded as indicated in the key legend. **B)** Phylogenetic tree of all 45 *emm3* isolates from setting 6 outbreak. Settings and sample source are colour and shape-coded as indicated in panel A. Isolates from the same sample types that are 0 SNP apart are plotted together; isolates from different sample types that are 0 SNP apart are plotted side-by-side to facilitate visualization. Scale bar indicates nucleotide substitutions per site.

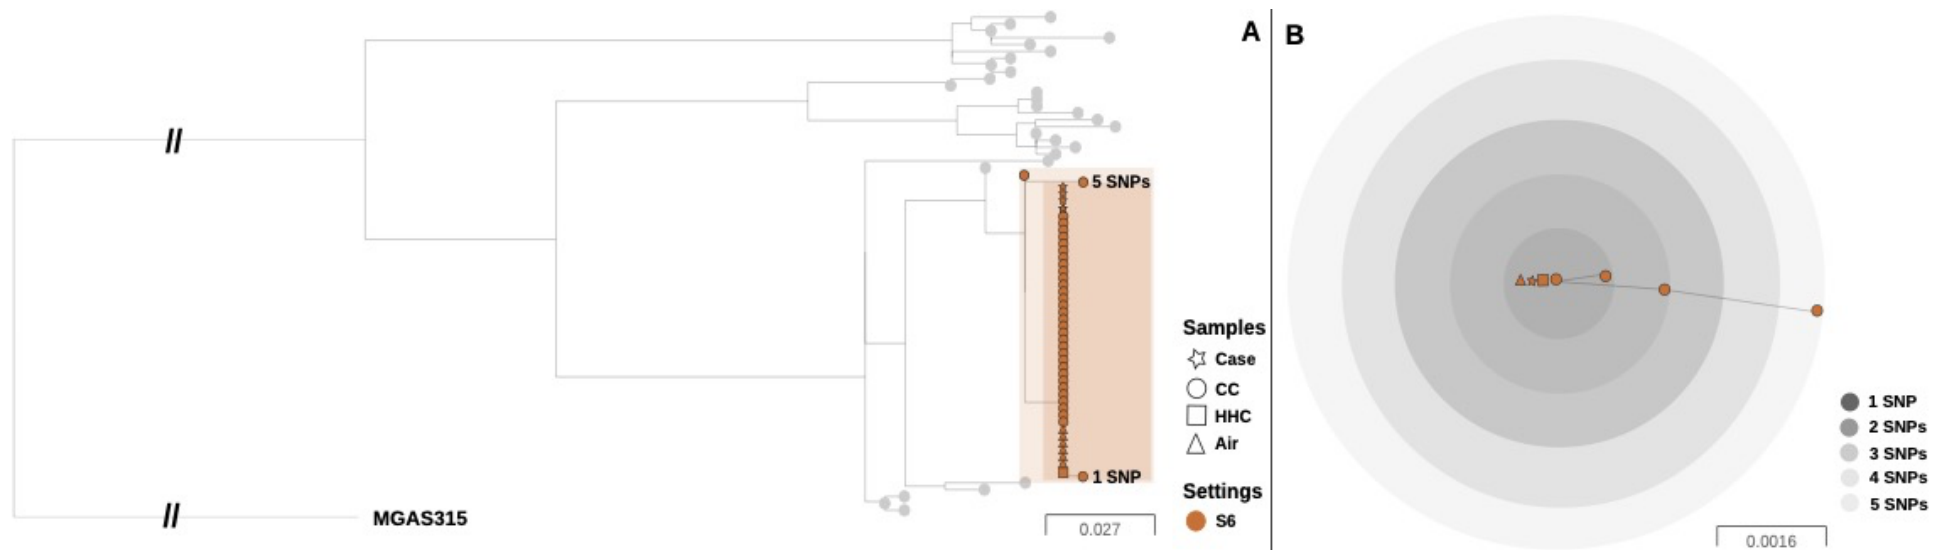

## Supplementary Methods

*Case definition.* Confirmed cases were those with a clinical diagnosis of scarlet fever by a health professional (sore throat, fever, sand-papery rash) and *Streptococcus pyogenes* grown from a throat swab. Probable cases were those with a clinical diagnosis of scarlet fever by a health professional without bacteriological confirmation. Possible cases were those reported by a reliable source (e.g. nursery or school manager), presenting with signs and symptoms consistent with scarlet fever, and a close epidemiological link e.g. household contact of a confirmed case; or attending school where there is a confirmed scarlet fever outbreak.

*Recruitment of schools.* Confirmed and probable cases of scarlet fever were identified by notifications to local Health Protection Teams. Schools and nurseries were invited to participate if they had two confirmed or probable scarlet fever cases aged 2-8 years from the same class within ten days of each other, with the most recent case arising in the preceding 48h. Locations were excluded if reported cases did not match criteria for cases, if timings did not match inclusion criteria, or if they declined.

*Bacteriology and sampling.* Swabs from participants were transported in Amies medium (Deltalab, Barcelona, Spain), then plated immediately onto Columbia Blood Agar (CBA, Oxoid, Basingstoke, UK). For cough plates, participants were encouraged to cough onto CBA held at a distance of 20cm from the mouth. CBA plates were incubated in a BSL2 laboratory at 37°C 5% CO<sub>2</sub> overnight then inspected for beta-haemolytic colonies. *S. pyogenes* was identified using Bruker MALDI-ToF Biotyper (Bruker Daltonics, Bremen, Germany). To evaluate presence of *S. pyogenes* DNA in stored culture-negative throat swabs, the *S. pyogenes* housekeeping gene *proS* was amplified from extracted DNA using primers *ProS F* 5'TGAGTTTATTATGAAAGACGGCTATAGTTTC and *ProS R* 5'-AATAGCTTCGTAAGCTTGACGATAATC and copies of *proS* were quantified by comparison with standard concentrations of a plasmid containing a single copy of *proS* as described previously (1). The lower 99% confidence interval of the geometric mean value obtained from 66 culture-positive throat samples from 2019 was used as a cut off (~ 91.6 copies/swab).

In year 1, surface samples (25cm<sup>2</sup>) were obtained from frequently touched surfaces in classrooms in week 1 only (20 samples per classroom) using dry cotton swabs moistened in sterile saline. Swabs were placed into 1 ml of sterile saline, and transported to the laboratory where they were diluted using a 10 times serial dilution in sterile phosphate buffered saline to

a dilution of  $10^{-6}$ . Duplicate 50  $\mu$ l volumes of each dilution were plated on to CBA plates and incubated at 37°C in air supplemented with 5% CO<sub>2</sub> for 48h.

In year 2, air settle plates were used to detect airborne dispersal of *S. pyogenes* using CBA plates placed on horizontal surfaces that were at least 1.5m high such as shelves and cupboards. A pilot study (setting 4) revealed that plates left for 24h were overgrown and unreadable, therefore, for settings 5 and 6, settle plates were left for 2-3h while children were using the classroom. Four plates were used per classroom per time point in settings 4-6, on each of the weeks studied.

*Genomic analysis.* DNA was extracted from all cultured *S. pyogenes* isolates from overnight cultures and *emm* genotyping was performed according to the protocol of the Centers for Diseases Control and Prevention ([www.cdc.gov/ncidod/biotech/strep/protocol\\_emmtype](http://www.cdc.gov/ncidod/biotech/strep/protocol_emmtype)) followed by pair-end 150bp read length whole genome sequencing on an Illumina HiSeq 2000 platform (Illumina, USA) according to the manufacturer's protocol. In 2019 (settings 4-6) *emm*-typing was performed only from whole genome sequencing data using BLAST+ version 2.2.30 against a specific *S. pyogenes emm*-type database (<https://www2.cdc.gov/vaccines/biotech/strepblast.asp>). Sequence data have been submitted to the European Nucleotide Archive (ENA - [www.ebi.ac.uk/ena](http://www.ebi.ac.uk/ena)) under the accession number PRJEB43915 (Supplementary table 8). Raw reads were trimmed using trimmomatic version 0.36 (2) with the following parameters: trimCrop=N, trimHeadCrop=N, sliding window 5:20, trim leading=3, trim trailing=4, trim min length=55, before any further downstream analysis. The comparative SNP-calling analysis was performed by mapping trimmed reads of 136 *S. pyogenes* isolates to the complete *emm89* reference sequence H293 (HG316453.2) using Snippy v4.6.0 (<https://github.com/tseemann/snippy>), with a minimum coverage of 10, minimum fraction of 0.9, and minimum vcf variant call quality of 100.

Gubbins version 2.4.1 (3) was used to identify and remove recombinant regions from the resulting full genome alignment file. A maximum likelihood phylogeny was created from core SNPs using the general time-reversible (GTR) model of nucleotide substitution with the gamma distributed rate heterogeneity implemented in FastTree v2.1.10-4 (4) Phylogenetic trees were visualized using FigTree v1.4.2 (<http://tree.bio.ed.ac.uk/software/figtree/>) and Microreact (<https://microreact.org/showcase>) and edited using INKSCAPE (<https://inkscape.org/pt/>). Genetic diversity within *emm*-types identified as dominating in each setting (*emm 1*, *emm 3*, *emm 4* and *emm 6*) was assessed by comparison with previously sequenced isolates from an earlier UK scarlet fever study (5) (**Supplementary Table 9**) and using *emm*-type specific reference genomes as follows: for *emm1*, MGAS5005 (CP000017); for *emm3*, MGAS315 (NC\_004070); for *emm4*, MGAS10750 (NC\_008024); for *emm6*,

MGAS10394 (NC\_006086). The SNP distance matrix was obtained using snp-dist (<https://github.com/tseemann/snp-dists>). SNPs identified within each outbreak setting were classified as non-coding, missense or synonymous according to the location in the genome and effect on protein using Snippy. The functional effect of each amino acid substitution was predicted using PROVEAN Protein database ([http://provean.jcvi.org/seq\\_submit.php](http://provean.jcvi.org/seq_submit.php)). *emm4* sub-lineage classification (M4 “complete” vs M4 “degraded”) was performed as described by Remington *et al.* 2021 (6), while *emm1* sub-lineage classification (M1 vs M1<sub>UK</sub>) was performed as described by Lynskey, Jauneikaite *et al.* 2019 (7).

## References for supplementary methods

1. Edwards RJ, Pyzio M, Gierula M, Turner CE, Abdul-Salam VB, Sriskandan S. 2018. Proteomic analysis at the sites of clinical infection with invasive *Streptococcus pyogenes*. *Sci Rep.* 2018;8(1):5950. doi:10.1038/s41598-018-24216-2
2. Bolger AM, Lohse M, Usadel B. Trimmomatic: a flexible trimmer for Illumina sequence data, *Bioinformatics*, Volume 30, Issue 15, 1 August 2014, Pages 2114–2120. doi.org/10.1093/bioinformatics/btu170
3. Croucher NJ, Page AJ, Connor TR, Delaney AJ, Keane JA, Bentley SD, Parkhill J, Harris SR. 2015. Rapid phylogenetic analysis of large samples of recombinant bacterial whole genome sequences using Gubbins. *Nucleic Acids Res* 43:e15.
4. Price, M.N., Dehal, P.S., and Arkin, A.P. (2009) FastTree: Computing Large Minimum-Evolution Trees with Profiles instead of a Distance Matrix. *Molecular Biology and Evolution* 26:1641-1650, doi:10.1093/molbev/msp077.
5. Chalker V, Jironkin A, Coelho J, Al-Shahib A, Platt S, Kapatai G, Daniel R, Dhami C, Laranjeira M, Chambers T, Guy R, Lamagni T, Harrison T, Chand M, Johnson AP, Underwood A; Scarlet Fever Incident Management Team. Genome analysis following a national increase in Scarlet Fever in England 2014. *BMC Genomics.* 2017 Mar 10;18(1):224. doi: 10.1186/s12864-017-3603-z. PMID: 28283023; PMCID: PMC5345146
6. Remington A, Haywood S, Edgar J, Green LR, de Silva T, Turner CE. Cryptic prophages within a *Streptococcus pyogenes* genotype *emm4* lineage. *Microb Genom.* 2021 Jan;7(1). doi: 10.1099/mgen.0.000482. Epub 2020 Nov 27. PMID: 33245690.
7. Lynskey NN, Jauneikaite E, Li HK, et al. Emergence of dominant toxigenic M1T1 *Streptococcus pyogenes* clone during increased scarlet fever activity in England: a population-based molecular epidemiological study. *Lancet Infect Dis.* 2019;19(11):1209-1218. doi:10.1016/S1473-3099(19)30446-3
